# Supplementary material for: Delta-mu XANES reveals the electronic structure of the adsorption of propene on gold nanoparticles
Source: Royal Society of Chemistry journal article supplement (doi:10.1039/c3ra47209d), 2014-01-01
Supplement: c3ra47209d1.pdf [file c3ra47209d1.pdf]

## Supplementary information

# Delta-mu X-ray Absorption Near Edge Structure Reveals the Electronic Structure of the Adsorption of Propene on Gold Nanoparticles

Ana Mijovilovich,<sup>\*,a</sup>

<sup>5</sup>  
*a\** Inorganic Chemistry and Catalysis group, Utrecht University, Universiteitsweg 99, 3584 CG Utrecht, The Netherlands. Present address: visiting scientist at Instituto de Investigaciones Físicas de Mar del Plata (CONICET-UNMdP) Funes 3350 - (7600) Mar del Plata, <sup>10</sup> Argentina; E-mail: ana\_mijo@yahoo.com

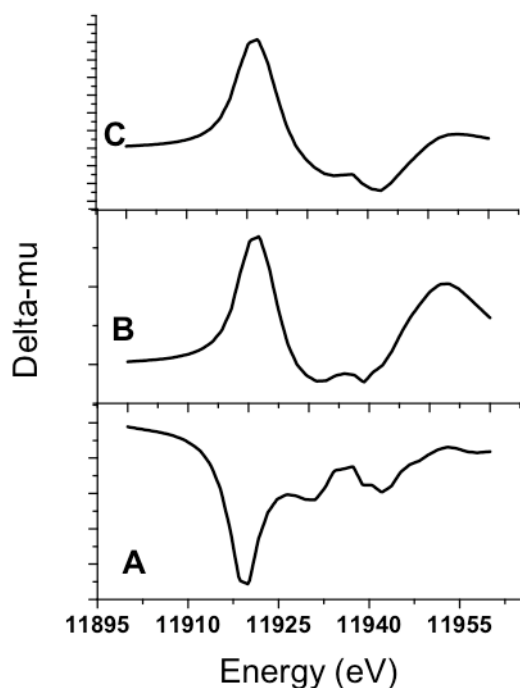

Figure 1S. Au delta-mu for Au/Au(111) (bottom to top): A) H oxidated, and B) propene co-feed on neutral cluster. In C) Au delta-mu of the 5-atom neutral nanoparticle propene cofed.
